# Supplementary material for: Structure of the Cladosporium fulvum Avr4 effector in complex with (GlcNAc)6 reveals the ligand-binding mechanism and uncouples its intrinsic function from recognition by the Cf-4 resistance protein
Source: PubMed Central journal article supplement (PMC6128652; doi:10.1371/journal.ppat.1007263), 2018-08-27
Supplement: ppat.1007263.s001.pdf [file ppat.1007263.s001.pdf]

**Supporting Table 1.** Data Collection and Refinement Statistics for CfAvr4 (PDB ID: 6BN0).

| <b>X-ray Source</b>                             | <b>ALS 8.3.1</b>                              |
|-------------------------------------------------|-----------------------------------------------|
| Wavelength (Å)                                  | 1.11583                                       |
| Temperature (K)                                 | 100                                           |
| Space group                                     | <i>P2</i> <sub>1</sub>                        |
| Unit-cell parameters (Å, °)                     | a=39.86, b=41.08, c=121.36<br>α=γ=90, β=97.87 |
| Resolution (Å)                                  | 60.11-1.95 (2.00-1.95)                        |
| <i>R</i> <sub>merge</sub> <sup>a</sup> (%)      | 5.4 (61.2)                                    |
| <I/σ(I)>                                        | 13.69 (2.12)                                  |
| CC <sub>1/2</sub> (%)                           | 99.9 (74.8)                                   |
| No. of reflections                              | 104,460 (7,850)                               |
| No. of unique reflections                       | 28,654 (2,110)                                |
| Completeness (%)                                | 99.6 (99.8)                                   |
| Redundancy                                      | 3.65 (3.72)                                   |
| <b>Refinement Statistics</b>                    |                                               |
| Resolution (Å)                                  | 60.11-1.95 (2.02-1.95)                        |
| No. of reflections (F>0) used in refinement     | 28,641 (2,719)                                |
| <i>R</i> <sub>factor</sub> <sup>b</sup> (%)     | 16.77                                         |
| <i>R</i> <sub>free</sub> <sup>c</sup> (%)       | 21.40                                         |
| RMS bond length (Å)                             | 0.013                                         |
| RMS bond angle (°)                              | 1.261                                         |
| Overall B Value (Å <sup>2</sup> )               | 44.01                                         |
| <b>Ramachandran Plot Statistics<sup>d</sup></b> |                                               |
| Residues                                        | 207                                           |
| Most favored Region                             | 97.7%                                         |
| Allowed Region                                  | 2.3%                                          |
| Disallowed                                      | 0.0%                                          |

<sup>a</sup>  $R_{\text{merge}} = [\sum_h \sum_i |I_h - \bar{I}_h| / \sum_h \sum_i I_h]$  where  $\bar{I}_h$  is the mean of  $I_{hi}$  observations of reflection  $h$ . Numbers in parenthesis represent highest resolution shell. <sup>b</sup>  $R_{\text{factor}} = \sum ||F_{\text{obs}}| - |F_{\text{calc}}|| / \sum |F_{\text{obs}}| \times 100$  for 95% of recorded data ( $R_{\text{factor}}$ ) or 5% data ( $R_{\text{free}}$ ). <sup>d</sup> From MolProbity (Chen et al., 2010)
