# Supplementary material for: Structure of the Cladosporium fulvum Avr4 effector in complex with (GlcNAc)6 reveals the ligand-binding mechanism and uncouples its intrinsic function from recognition by the Cf-4 resistance protein
Source: PubMed Central journal article supplement (PMC6128652; doi:10.1371/journal.ppat.1007263), 2018-08-27
Supplement: ppat.1007263.s002.pdf [file ppat.1007263.s002.pdf]

**Supporting Table 2.** Amino acids in *CfAvr4* that interact with (GlcNAc)<sub>6</sub> in the dimeric assembly and the effect of mutating these residues on the (GlcNAc)<sub>6</sub> affinity of the protein and its recognition by the Cf-4 immune receptor.

| Amino acids interacting with (GlcNAc) <sub>6</sub> as determined by the solution structure of the <i>CfAvr4</i> -(GlcNAc) <sub>6</sub> complex |                                                               | Thermodynamic binding parameters to (GlcNAc) <sub>6</sub> as determined by isothermal titration calorimetry (ITC) |              |                                   |                     |             |               | Protein stability and recognition by Cf-4 as determined by pure protein infiltrations and ATTAs |                             |                              |
|------------------------------------------------------------------------------------------------------------------------------------------------|---------------------------------------------------------------|-------------------------------------------------------------------------------------------------------------------|--------------|-----------------------------------|---------------------|-------------|---------------|-------------------------------------------------------------------------------------------------|-----------------------------|------------------------------|
| Amino acid (Chain)                                                                                                                             | Interaction with GlcNAc unit in (GlcNAc) <sub>6</sub> (Chain) | Introduced mutation                                                                                               | Protein (mM) | (GlcNAc) <sub>6</sub> Ligand (mM) | K <sub>d</sub> (μM) | n           | ΔH (kJ/mol)   | Recognition by Cf-4 (pure protein infiltr)                                                      | Recognition by Cf-4 (ATTAs) | Stability (Subtilisin assay) |
| WT-CfAvr4                                                                                                                                      | (GlcNAc) <sub>6</sub>                                         | NA                                                                                                                | 0.198        | 2.10                              | 7.63 ± 1.74         | 1.17 ± 0.11 | -40.87 ± 1.42 | Y/Y <sup>1</sup>                                                                                | Y/Y/Y <sup>2</sup>          | S3                           |
| WT-CfAvr4 w/o tag                                                                                                                              | (GlcNAc) <sub>6</sub>                                         | NA                                                                                                                | 0.333        | 2.05                              | 6.73 ± 1.49         | 1.09 ± 0.12 | -37.58 ± 3.51 | -                                                                                               | -                           | -                            |
| WT-CfAvr4 reverse titration                                                                                                                    | (GlcNAc) <sub>6</sub>                                         | NA                                                                                                                | 1.03         | 0.33                              | 7.16 ± 0.76         | 1.01 ± 0.06 | -41.97 ± 1.90 | NA                                                                                              | NA                          | NA                           |
| Lys49 (Chain A)                                                                                                                                | GlcNAc-1 (Chain A)                                            | -                                                                                                                 | -            | -                                 | -                   | -           | -             | -                                                                                               | -                           | -                            |
| Cys50 (Chain A)                                                                                                                                | GlcNAc-2 (Chain A)                                            | -                                                                                                                 | -            | -                                 | -                   | -           | -             | -                                                                                               | -                           | -                            |
| Met51 (Chain A)                                                                                                                                | GlcNAc-2 (Chain A)                                            | M51A                                                                                                              | 0.293        | 1.56                              | 9.20 ± 1.47         | 1.01 ± 0.08 | -33.30 ± 0.87 | Y/Y                                                                                             | Y/Y/Y                       |                              |
| Pro53 (Chain A)                                                                                                                                | GlcNAc-1 (Chain A)                                            | P53A                                                                                                              | 0.300        | 1.52                              | 11.34 ± 2.58        | 0.94 ± 0.04 | -40.86 ± 2.26 | Y/Y                                                                                             | Y/Y/Y                       |                              |
| Tyr67 (Chain A)                                                                                                                                | GlcNAc-2 (Chain B)                                            | Y67F                                                                                                              | 0.201        | 2.08                              | 6.86 ± 1.24         | 1.01 ± 0.09 | -27.70 ± 1.01 | Y/Y                                                                                             | Y/Y/Y                       |                              |
| Tyr67 (Chain B)                                                                                                                                | GlcNAc-4 (Chain A)                                            |                                                                                                                   |              |                                   |                     |             |               |                                                                                                 |                             |                              |
| Gln69 (Chain A)                                                                                                                                | GlcNAc-2 (Chain A)                                            | Q69N                                                                                                              | 0.304        | 2.98                              | 130.95 ± 31.47      | 1.01 ± 0.10 | -18.84 ± 4.38 | P/Y                                                                                             | Y/Y/Y                       | PU                           |
| Gln69 (Chain B)                                                                                                                                | GlcNAc-2 (Chain B)                                            |                                                                                                                   |              |                                   |                     |             |               |                                                                                                 |                             |                              |
|                                                                                                                                                | GlcNAc-3 (Chain A)                                            |                                                                                                                   |              |                                   |                     |             |               |                                                                                                 |                             |                              |
| Lys84 (Chain A)                                                                                                                                | GlcNAc-1 (Chain B)                                            | K84A                                                                                                              | 0.598        | 3.11                              | 120.67 ± 18.77      | 0.92 ± 0.11 | -19.53 ± 1.73 | Y/Y                                                                                             | Y/Y/Y                       | S                            |
| Lys84 (Chain B)                                                                                                                                | GlcNAc-3 (Chain A)                                            |                                                                                                                   |              |                                   |                     |             |               |                                                                                                 |                             |                              |
| Pro87 (Chain A)                                                                                                                                | GlcNAc-3 (Chain B)                                            | P87A                                                                                                              | 0.298        | 1.04                              | 17.94 ± 0.44        | 0.91 ± 0.03 | -41.82 ± 1.94 | Y/Y                                                                                             | Y/Y/Y                       |                              |
| Pro87 (Chain A)                                                                                                                                | GlcNAc-4 (Chain B)                                            |                                                                                                                   |              |                                   |                     |             |               |                                                                                                 |                             |                              |
| Pro87 (Chain B)                                                                                                                                | GlcNAc-5 (Chain A)                                            |                                                                                                                   |              |                                   |                     |             |               |                                                                                                 |                             |                              |
| Pro87 (Chain B)                                                                                                                                | GlcNAc-6 (Chain A)                                            |                                                                                                                   |              |                                   |                     |             |               |                                                                                                 |                             |                              |
| Trp100 (Chain A)                                                                                                                               | GlcNAc-5 (Chain A)                                            | W100A                                                                                                             | 0.300        | no binding                        | no binding          | no binding  | no binding    | Y/Y                                                                                             | Y/Y/Y                       | S                            |
| Cys101 (Chain A)                                                                                                                               | GlcNAc-5 (Chain A)                                            | -                                                                                                                 | -            | -                                 | -                   | -           | -             | -                                                                                               | -                           | -                            |
| Asp102 (Chain A)                                                                                                                               | GlcNAc-6 (Chain B)                                            | D102A                                                                                                             | 0.295        | no binding                        | no binding          | no binding  | no binding    | P/Y                                                                                             | Y/Y/Y                       | PU                           |
| Tyr103 (Chain A)                                                                                                                               | GlcNAc-6 (Chain A)                                            | Y103F                                                                                                             | 0.310        | 2.10                              | 12.19 ± 4.50        | 1.01 ± 0.07 | -32.32 ± 0.50 | Y/Y                                                                                             | Y/Y/Y                       |                              |
|                                                                                                                                                | GlcNAc-5 (Chain B)                                            |                                                                                                                   |              |                                   |                     |             |               |                                                                                                 |                             |                              |
| Asn93 (Chain A/B)                                                                                                                              | None                                                          | N93A                                                                                                              | 0.240        | 2.43                              | 44.70 ± 2.74        | 0.95 ± 0.12 | -8.78 ± 0.98  | N/N                                                                                             | Y/Y/Y                       | PU                           |
| Asp94 (Chain A/B)                                                                                                                              | None                                                          | D94A                                                                                                              | 0.213        | 2.26                              | 37.63 ± 7.22        | 1.08 ± 0.07 | -12.83 ± 0.75 | N/N                                                                                             | Y/Y/Y                       | PU                           |
| Asn95 (Chain A/B)                                                                                                                              | None                                                          | N95A                                                                                                              | 0.206        | 1.10                              | 18.85 ± 6.03        | 1.06 ± 0.03 | -25.20 ± 0.87 | Y/Y                                                                                             | Y/Y/Y                       |                              |

<sup>1</sup> Infiltrations with 5 μg/ml / 10 μg/ml. Y: Yes HR; P: Partial HR; N: No HR; <sup>2</sup> Co-infiltrations between effector and receptor of at cell density ratios of 0.5:1 / 1:1 / 2:1. Y: Yes HR; <sup>3</sup> S: stable; PU: partially unstable
